# Supplementary material for: CARB-ES-19 Multicenter Study of Carbapenemase-Producing Klebsiella pneumoniae and Escherichia coli From All Spanish Provinces Reveals Interregional Spread of High-Risk Clones Such as ST307/OXA-48 and ST512/KPC-3
Source: PubMed Central journal article supplement (PMC9279682; doi:10.3389/fmicb.2022.918362), 2022-06-30
Supplement: Table_1.pdf [file Table_1.pdf]

**Table S1.** Primers used for carbapenemases genes amplification.

| Target | Primer   | Sequence (5' to 3', as synthesized) | Expected amplicon size (bp) |
|--------|----------|-------------------------------------|-----------------------------|
| OXA-48 | OXA-48-F | TCACAGGGCGTAGTTGTGCT                | 126                         |
|        | OXA-48-R | GAGGGCGATCAAGCTATTGG                |                             |
| VIM    | VIM-F    | TTTGACCGCCTCTATCATGG                | 125                         |
|        | VIM-R    | CGGACAATGAGACCATTGGA                |                             |
| NDM    | NDM-F    | AGGACAAGATGGGCGGTATG                | 124                         |
|        | NDM-R    | GCGAAAGTCAGGCTGGTTG                 |                             |
| KPC    | KPC-F    | GTCGGAGACAAAACCGGAAC                | 102                         |
|        | KPC-R    | GGTGTAGACGGCCAACACAA                |                             |
| IMP    | IMP-F    | TTCCATAGCGACAGCACRGG                | 88                          |
|        | IMP-R    | GGGCCRGGRTARAACTTC                  |                             |

The PCR program consisted of an initial denaturation step at 95°C for 10 min, followed by 45 cycles of DNA denaturation at 95°C for 15s, primer annealing at 51°C for 30s, and primer extension at 72°C for 15s. After the last cycle, a final extension step at 72°C for 10 min was added
