# Supplementary material for: CARB-ES-19 Multicenter Study of Carbapenemase-Producing Klebsiella pneumoniae and Escherichia coli From All Spanish Provinces Reveals Interregional Spread of High-Risk Clones Such as ST307/OXA-48 and ST512/KPC-3
Source: PubMed Central journal article supplement (PMC9279682; doi:10.3389/fmicb.2022.918362), 2022-06-30
Supplement: Table_2.pdf [file Table_2.pdf]

**Table S2. Distribution by Spanish provinces of the participating hospitals, number of cases, incidence and prevalence of CPE.**

| Province         | Number of hospitals | CP* <i>K. pneumoniae</i> | CP* <i>E.coli</i> | CP* <i>K. pneumoniae</i> prevalence by province | CP* <i>E.coli</i> prevalence by province | CPE** Cumulative incidence | CPE** Incidence density |
|------------------|---------------------|--------------------------|-------------------|-------------------------------------------------|------------------------------------------|----------------------------|-------------------------|
| Álava            | 1                   | 2                        | 0                 | 0.76                                            | 0                                        | 0.02                       | 0.04                    |
| Albacete         | 1                   | 1                        | 1                 | 0.29                                            | 0.05                                     | 0.01                       | 0.02                    |
| Alicante         | 2                   | 8                        | 0                 | 0.97                                            | 0                                        | 0.06                       | 0.11                    |
| Almería          | 2                   | 4                        | 0                 | 0.82                                            | 0                                        | 0.03                       | 0.04                    |
| Asturias         | 1                   | 6                        | 4                 | 2.05                                            | 0.22                                     | 0.09                       | 0.14                    |
| Ávila            | 1                   | 4                        | 0                 | 3.74                                            | 0                                        | 0.05                       | 0.09                    |
| Badajoz          | 1                   | 3                        | 0                 | 1.84                                            | 0                                        | 0.32                       | 0.22                    |
| Baleares         | 1                   | 0                        | 2                 | 0                                               | 0.24                                     | 0.03                       | 0.04                    |
| Barcelona        | 7                   | 42                       | 9                 | 3.06                                            | 0.15                                     | 0.03                       | 0.05                    |
| Burgos           | 2                   | 3                        | 0                 | 1.54                                            | 0                                        | 0.02                       | 0.03                    |
| Cáceres          | 1                   | 10                       | 0                 | 4.22                                            | 0                                        | 0.18                       | 0.29                    |
| Cádiz            | 2                   | 16                       | 0                 | 4.94                                            | 0                                        | 0.06                       | 0.08                    |
| Cantabria        | 1                   | 10                       | 0                 | 13.70                                           | 0                                        | 0.23                       | 0.53                    |
| Castellón        | 1                   | 0                        | 0                 | 0                                               | 0                                        | 0                          | 0                       |
| Ciudad Real      | 2                   | 16                       | 0                 | 5.14                                            | 0                                        | 0.06                       | 0.08                    |
| Córdoba          | 1                   | 10                       | 0                 | 8.26                                            | 0                                        | 0.09                       | 0.14                    |
| Cuenca           | 1                   | 1                        | 0                 | 1.79                                            | 0                                        | 0.03                       | 0.05                    |
| Girona           | 1                   | 9                        | 1                 | 2.38                                            | 0.06                                     | 0.13                       | 0.32                    |
| Gran Canaria     | 1                   | 9                        | 1                 | 7.44                                            | 0.31                                     | 0.33                       | 0.34                    |
| Granada          | 2                   | 10                       | 0                 | 3.48                                            | 0                                        | 0.05                       | 0.10                    |
| Guadalajara      | 1                   | 10                       | 0                 | 7.87                                            | 0                                        | 0.34                       | 0.58                    |
| Guipuzcoa        | 1                   | 2                        | 0                 | 0.42                                            | 0                                        | 0.01                       | 0.03                    |
| Huelva           | 1                   | 2                        | 1                 | 0.73                                            | 0.07                                     | 0.05                       | 0.08                    |
| Huesca           | 1                   | 0                        | 0                 | 0                                               | 0                                        | 0                          | 0                       |
| Jaén             | 1                   | 5                        | 0                 | 5.43                                            | 0                                        | 0.13                       | 0.14                    |
| La Coruña        | 2                   | 18                       | 0                 | 3.06                                            | 0                                        | 0.04                       | 0.05                    |
| La Rioja         | 2                   | 2                        | 0                 | 0.63                                            | 0                                        | 0.03                       | 0.05                    |
| León             | 1                   | 8                        | 0                 | 4.19                                            | 0                                        | 0.09                       | 0.13                    |
| Lérida           | 1                   | 1                        | 0                 | 0.20                                            | 0                                        | 0.02                       | 0.04                    |
| Lugo             | 1                   | 10                       | 0                 | 5.78                                            | 0                                        | 0.16                       | 0.19                    |
| Madrid           | 4                   | 34                       | 4                 | 5.21                                            | 0.17                                     | 0.20                       | 0.30                    |
| Malaga           | 2                   | 14                       | 0                 | 3.85                                            | 0                                        | 0.15                       | 0.21                    |
| Murcia           | 1                   | 0                        | 0                 | 0                                               | 0                                        | 0                          | 0                       |
| Navarra          | 1                   | 1                        | 0                 | 2.13                                            | 0                                        | 0.06                       | 0.07                    |
| Orense           | 1                   | 8                        | 2                 | 3.32                                            | 0.14                                     | 0.01                       | 0.02                    |
| Palencia         | 1                   | 10                       | 0                 | 11.76                                           | 0                                        | 0.16                       | 0.27                    |
| Pontevedra       | 1                   | 10                       | 0                 | 5.62                                            | 0                                        | 0.16                       | 0.29                    |
| Salamanca        | 1                   | 0                        | 0                 | 0                                               | 0                                        | 0                          | 0                       |
| Segovia          | 1                   | 9                        | 1                 | 10.11                                           | 0.16                                     | 0.09                       | 0.16                    |
| Sevilla          | 1                   | 3                        | 0                 | 4.69                                            | 0                                        | 0.03                       | 0.05                    |
| Soria            | 1                   | 1                        | 0                 | 1.03                                            | 0                                        | 0.04                       | 0.05                    |
| St Cruz Tenerife | 1                   | 10                       | 0                 | 14.08                                           | 0                                        | 0.31                       | 0.32                    |
| Tarragona        | 1                   | 2                        | 0                 | 1.18                                            | 0                                        | 0.03                       | 0.07                    |
| Teruel           | 1                   | 1                        | 0                 | 1.20                                            | 0                                        | 0                          | 0                       |
| Toledo           | 1                   | 9                        | 0                 | 1.56                                            | 0                                        | 0.04                       | 0.07                    |
| Valencia         | 1                   | 10                       | 0                 | 3.50                                            | 0                                        | 0.10                       | 0.16                    |
| Valladolid       | 1                   | 8                        | 0                 | 3.86                                            | 0                                        | 0.03                       | 0.05                    |
| Vizcaya          | 2                   | 16                       | 0                 | 1.92                                            | 0                                        | 0.05                       | 0.09                    |
| Zamora           | 1                   | 6                        | 0                 | 4.00                                            | 0                                        | 0.04                       | 0.06                    |
| Zaragoza         | 3                   | 3                        | 0                 | 0.35                                            | 0                                        | 0.01                       | 0.01                    |
| <b>Total</b>     | <b>71</b>           | <b>377</b>               | <b>26</b>         | <b>2.50</b>                                     | <b>0.04</b>                              | <b>0.05</b>                | <b>0.08</b>             |

\*CP: carbapenemase-producing

\*\*CPE: carbapenemase-producing Enterobacterales (including only *Klebsiella pneumoniae* and *Escherichia coli*)
