# Supplementary material for: CARB-ES-19 Multicenter Study of Carbapenemase-Producing Klebsiella pneumoniae and Escherichia coli From All Spanish Provinces Reveals Interregional Spread of High-Risk Clones Such as ST307/OXA-48 and ST512/KPC-3
Source: PubMed Central journal article supplement (PMC9279682; doi:10.3389/fmicb.2022.918362), 2022-06-30
Supplement: Table_3.pdf [file Table_3.pdf]

**Table S3.** Antibiotic susceptibility of 26 carbapenemase-producing *Escherichia coli* isolates as determined by the microdilution method and antibiotic gradient strips (antibiotics with \*) according to EUCAST clinical breakpoints.

| Antibiotics                   | S (%) | R (%) | MIC <sub>50</sub> * | MIC <sub>90</sub> * | Range*      |
|-------------------------------|-------|-------|---------------------|---------------------|-------------|
| Meropenem/Vaborbactam*        | 100   | 0     | 0.25                | 2                   | 0.03 - 4    |
| Plazomicin*                   | 100   | 0     | 1                   | 2                   | 0.06 - 2    |
| Cefiderocol*                  | 96.2  | 3.8   | 0.03                | 0.25                | ≤0.015 - 4  |
| Colistin                      | 92.3  | 7.7   | 1                   | 1                   | 0.5 - 8     |
| Meropenem                     | 88.5  | 0     | 1                   | 3                   | 0.25 - 8    |
| Imipenem/Relebactam*          | 84.6  | 15.4  | 1                   | 4                   | 0.25 - 8    |
| Tigecycline                   | 84.6  | 15.4  | 0.5                 | 1                   | ≤0.25 - 1   |
| Amikacin                      | 84.6  | 15.4  | ≤4                  | 16                  | ≤4 - 16     |
| Ceftazidime/Avibactam         | 76.9  | 23.1  | ≤0.5                | >16                 | ≤0.5 - >16  |
| Imipenem                      | 69.2  | 7.7   | 2                   | 4                   | ≤0.5 - 16   |
| Gentamicin                    | 65.4  | 34.6  | 1                   | >8                  | ≤0.5 - >8   |
| Tobramycin                    | 57.7  | 42.3  | ≤1                  | >8                  | ≤1 - >8     |
| Cefepime*                     | 50    | 46.2  | 2.5                 | 32                  | 0.12 - >256 |
| Aztreonam                     | 50    | 38.5  | 1.5                 | >32                 | ≤0.5 - >32  |
| Trimethoprim/Sulfamethoxazole | 46.2  | 53.8  | >8                  | >8                  | ≤1 - >8     |
| Ceftazidime                   | 42.3  | 53.8  | 16                  | >16                 | ≤0.5 - >16  |
| Ceftolozane/Tazobactam        | 42.3  | 57.7  | 12                  | >32                 | ≤0.5 - >32  |
| Cefotaxime                    | 23.1  | 61.5  | >8                  | >8                  | ≤0.5 - >8   |
| Ciprofloxacin                 | 19.2  | 76.9  | >2                  | >2                  | ≤0.06 - >2  |
| Ertapenem                     | 15.4  | 84.6  | 2                   | >2                  | 0.5 - >2    |
| Piperacillin/Tazobactam       | 0     | 100   | >32                 | >32                 | >32 - >32   |

S: susceptible. R: resistant. MIC: minimum inhibitory concentrations.

\* Expressed in mg/L.
